# Supplementary material for: Sensitivity Analysis of Cardiac Alternans and Tachyarrhythmia to Ion Channel Conductance Using Population Modeling
Source: MDPI journal article supplement (doi:10.3390/bioengineering9110628), 2022-11-01
Supplement: s1 [file s1]

## Supplementary Materials

### 1 Expression of ion channel currents [12]

Fast Na<sup>+</sup> current (I<sub>Na</sub>):

$$I_{Na} = G_{Na} m^3 h j (V_m - E_{Na}) \quad \text{Equation 1}$$

L-type Ca<sup>2+</sup> current (I<sub>CaL</sub>):

$$I_{CaL} = G_{CaL} d f f_{Ca} 4^{\frac{V_m F^2 C a_i e^{2V_m F/RT} - 0.341 C a_o}{e^{2V_m F/RT} - 1}} \quad \text{Equation 2}$$

Transient outward current (I<sub>to</sub>):

$$I_{to} = G_{to} r s (V_m - E_K) \quad \text{Equation 3}$$

Slow delayed rectifier current (I<sub>Ks</sub>):

$$I_{Ks} = G_{Ks} x_s^2 (V_m - E_K) \quad \text{Equation 4}$$

Rapid delayed rectifier current (I<sub>Kr</sub>):

$$I_{Kr} = G_{Kr} \sqrt{\frac{K_o}{5.4}} x_{r1} x_{r2} (V_m - E_K) \quad \text{Equation 5}$$

Inward rectifier K<sup>+</sup> current (I<sub>K1</sub>):

$$I_{K1} = G_{K1} \sqrt{\frac{K_o}{5.4}} x_{K1\infty} (V_m - E_K) \quad \text{Equation 6}$$

Plateau Ca<sup>+</sup> current

$$I_{pCa} = G_{pCa} \frac{C a_i}{K_{pCa} + C a_i} \quad \text{Equation 7}$$

Plateau K<sup>+</sup> current

$$I_{pK} = G_{pK} \frac{V_m - E_K}{1 + e^{(25 - V_m)/5.98}} \quad \text{Equation 8}$$

Background sodium and calcium leakage current

$$I_{bNa} = G_{bNa}(V_m - E_{Na}) \quad \text{Equation 9}$$

$$I_{bCa} = G_{bCa}(V_m - E_{Ca}) \quad \text{Equation 10}$$

### Reference

- [12]. Ten Tusscher, K.H.W.J., A model for human ventricular tissue. *AJP Hear. Circ. Physiol.* 2004; Volume 286, Issue 4, pp. H1573–H1589.

## Supplementary Figures

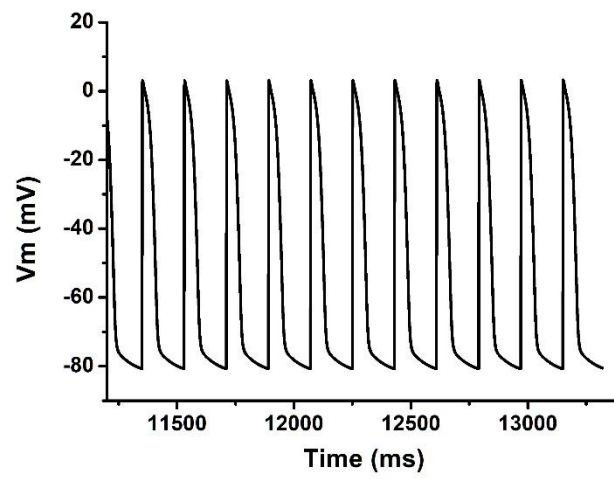

**Supplementary Figure S 1.** Representative action potential trace under the no alternans condition

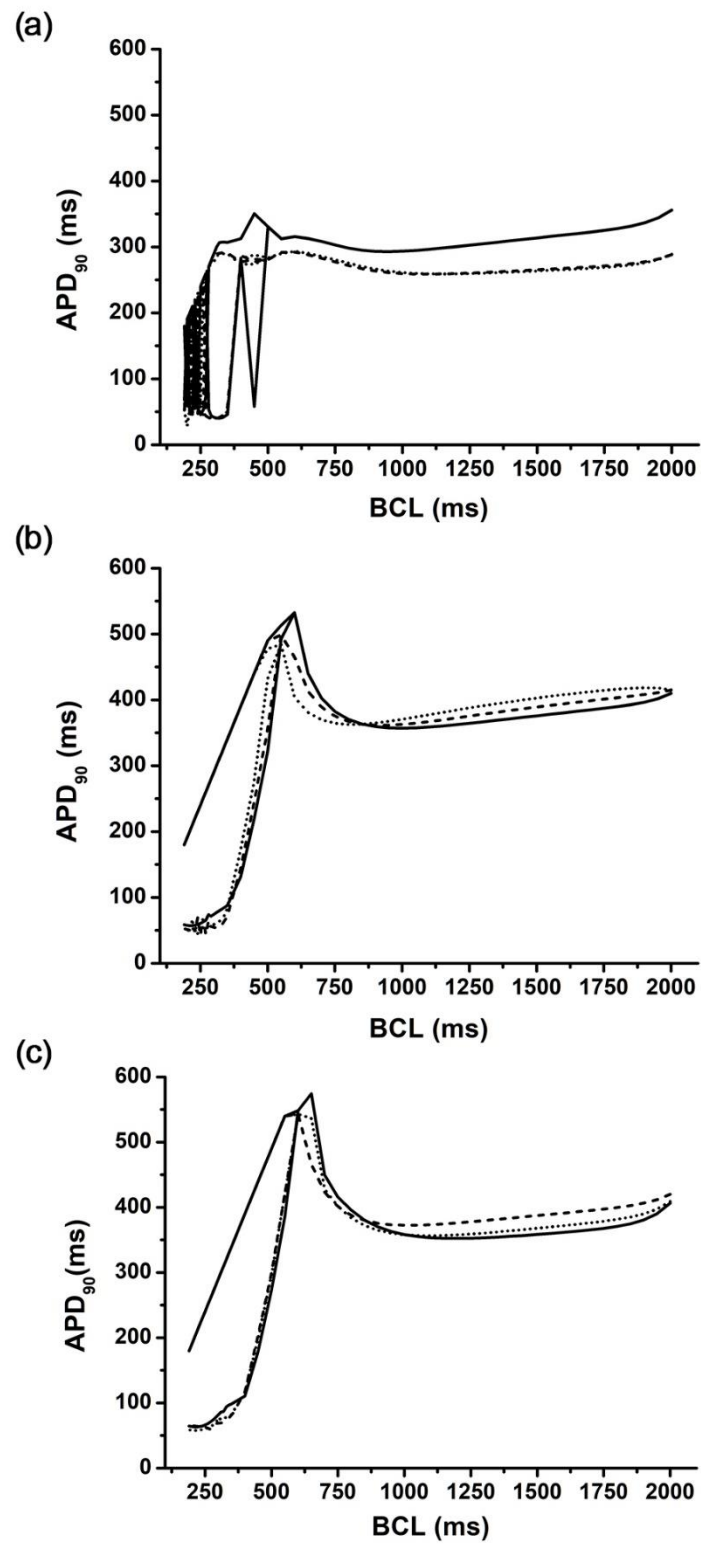

**Supplementary Figure S 2.** APDr curve in the cases that APD alternans occur under the resting cycle length condition; (a), AOCL = 450 ms; (b), AOCL= 500ms; (c), AOCL =550 ms

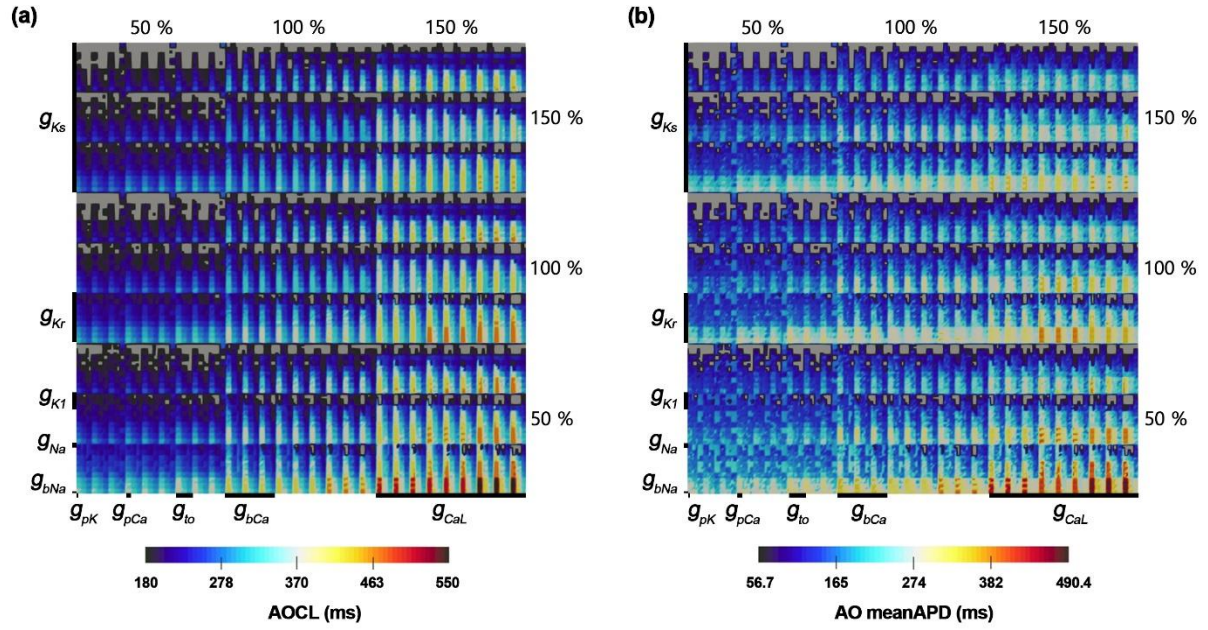

**Supplementary Figure S 3.** Unoptimized population maps of AOCL (a) and alternans onset mean APD (b); AOCL, alternans onset cycle length; APD, action potential duration; Gray parts represent no APD alternans scenarios.
